# Supplementary material
Source: PubMed Central journal article supplement (PMC5061674)
Supplement: 11357_2016_9930_MOESM1_ESM.pdf [file 11357_2016_9930_MOESM1_ESM.pdf]

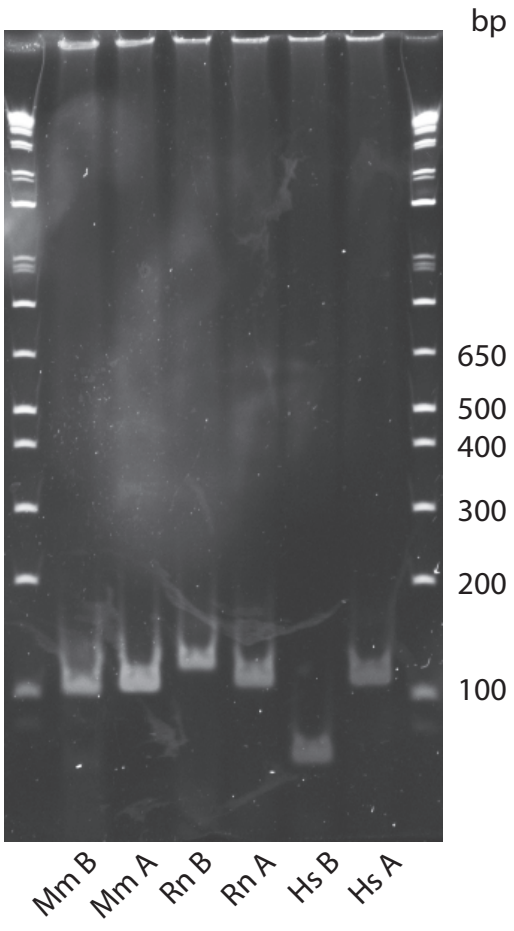

Figure S1: PAGE image of PCR amplicons used in standard generation demonstrating amplification of single products.
